# Supplementary material for: Effect of nickel on catalytic behaviour of bimetallic Cu–Ni catalyst supported on mesoporous alumina for the hydrogenolysis of glycerol to 1,2-propanediol
Source: Royal Society of Chemistry journal article supplement (doi:10.1039/c4cy00320a), 2014-01-01
Supplement: c4cy00320a1.pdf [file c4cy00320a1.pdf]

# Supplementary Information

Effect of nickel on catalytic behaviour of  
bimetallic Cu-Ni catalyst supported on  
mesoporous alumina for the hydrogenolysis of  
glycerol to 1,2-propanediol

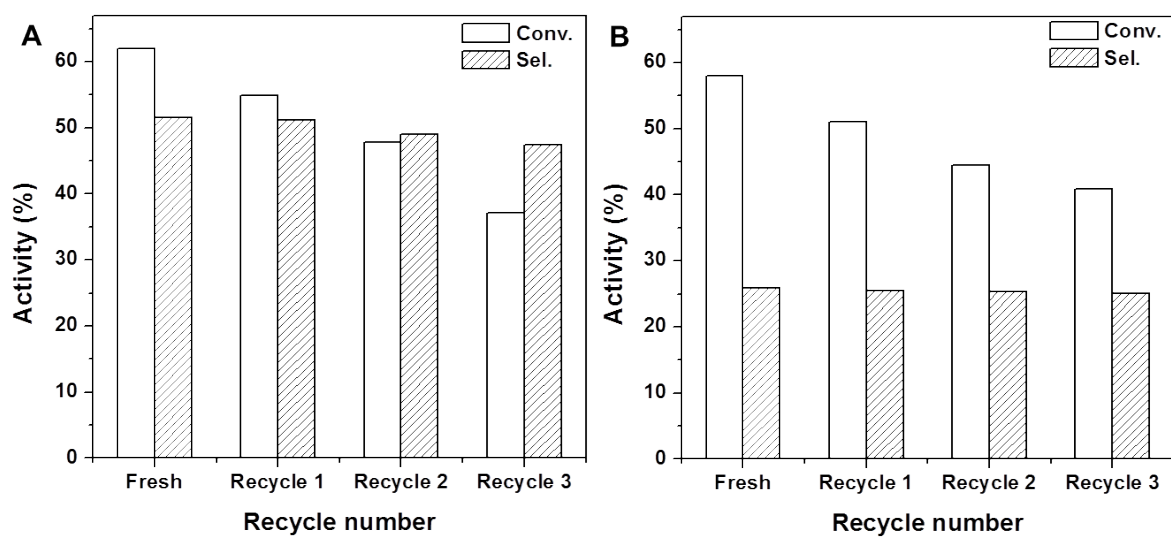

**Fig. S1** Catalytic recycling tests of A) 10Cu/MA and B) 7Cu-3Ni/MA catalysts in glycerol hydrogen olysis.

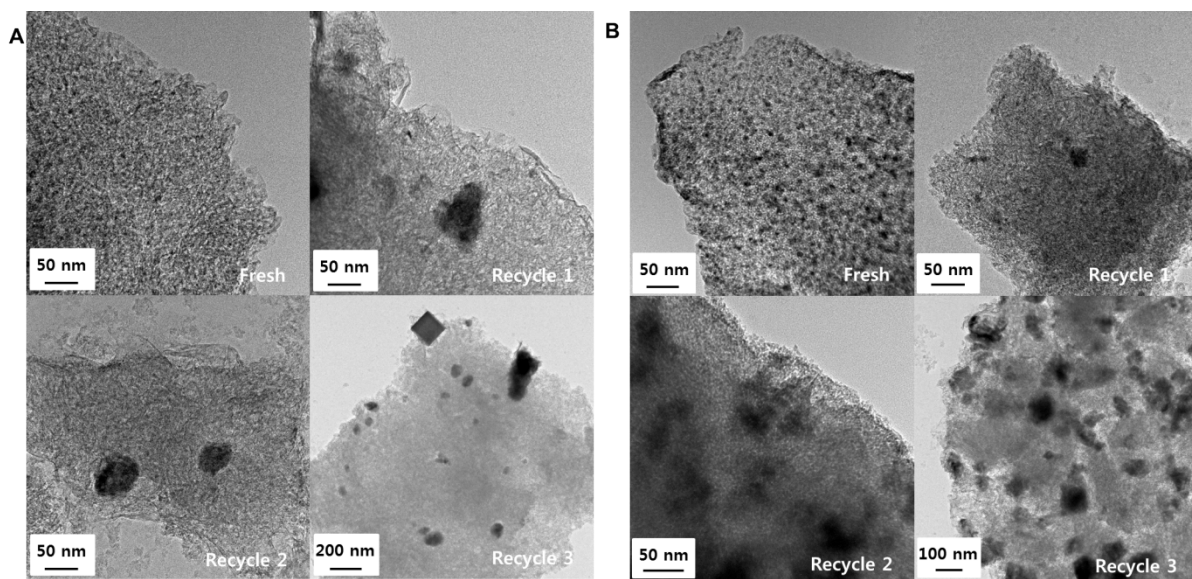

**Fig. S2** HR-TEM images of A) 10Cu/MA and B) 7Cu3Ni/MA catalysts after recycling tests.

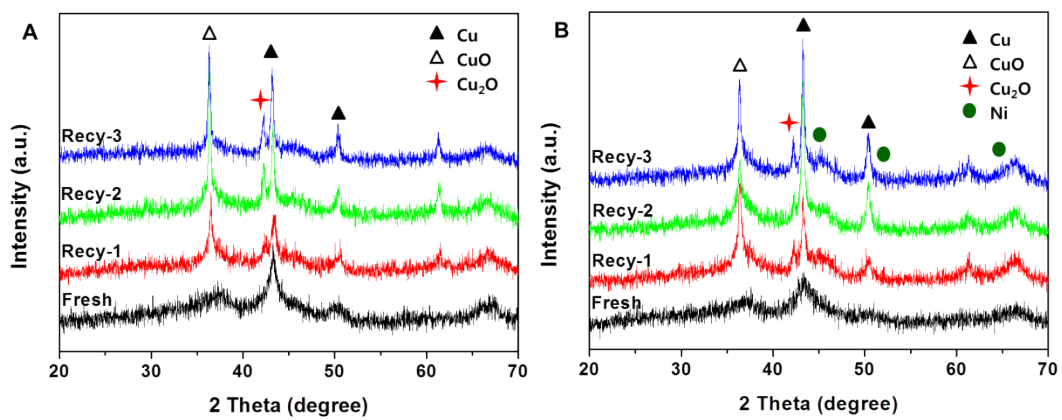

**Fig. S3** XRD patterns of A) 10Cu/MA and B) 7Cu3Ni/MA catalysts after recycling tests.

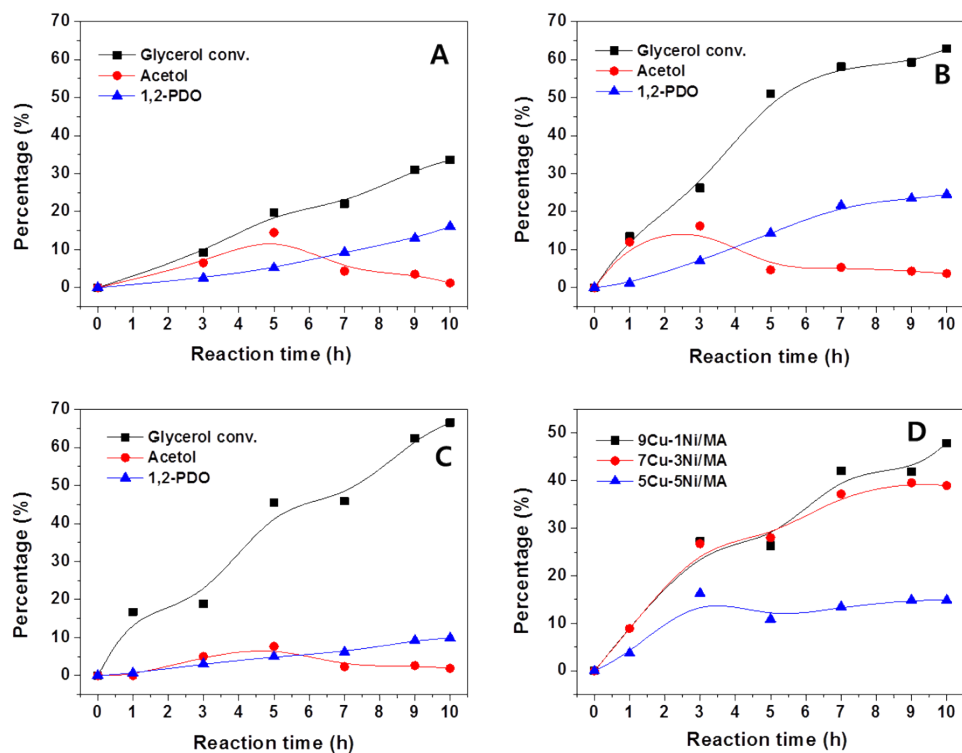

**Fig. S4.** Time on stream activity for (A) 9Cu-1Ni/MA, (B) 7Cu-3Ni/MA and (C) 5Cu-5Ni/MA catalysts, (D) Selectivity of 1,2-PDO at 10h in TOS test without a hydrogen supply in batch reactor.

**Table S1.** Compositions of various liquid and gas-phase products in TOS activity test without H<sub>2</sub>

| Products                | 9Cu-1Ni/MA | 7Cu-3Ni/MA | 5Cu-5Ni/MA |
|-------------------------|------------|------------|------------|
| <i>Liquid-phase (%)</i> |            |            |            |
| Formaldehyde            | 0.4        | 0.4        | 0.2        |
| Ethanol                 | 0.4        | 0.1        | 0          |
| 1PO + 2PO               | 0.1        | 0.2        | 0.2        |
| Acetol                  | 4.8        | 4          | 1.7        |
| EG                      | 2.6        | 1.2        | 0.8        |
| 1,2-PDO                 | 47.90      | 38.90      | 14.90      |
| <i>Gas-phase (%)</i>    |            |            |            |
| X <sub>Glycerol</sub>   | 10.9       | 11.5       | 12.6       |
| S <sub>CO2</sub>        | 68.3       | 55.3       | 35.1       |
| S <sub>CO</sub>         | 10.6       | 9.8        | 7.8        |
| S <sub>CH4</sub>        | 6.6        | 14.3       | 21.3       |
| S <sub>H2</sub>         | 36.2       | 36.6       | 52.8       |
